# Supplementary material
Source: MDPI journal article supplement (https://www.mdpi.com/2077-1312/12/4/559)
Supplement: s1 [file s1]

## Supplementary material

**Table S1.** Samples analysed for  $^{210}\text{Pb}$  analysis, estimated age (AD) and % of sand in the sample.

| Depth (cm bsf) | $^{210}\text{Pb}$ Excess (Bq/kg) | Estimated date year AD | %sand (63-2000 $\mu\text{m}$ ) |
|----------------|----------------------------------|------------------------|--------------------------------|
| 0-0.5          | $380.6 \pm 13.0$                 | $2013 \pm 1$           | No data                        |
| 1-1.5          | $465.3 \pm 22.9$                 | $2006 \pm 3$           | 28                             |
| 2-3            | $354.4 \pm 12.7$                 | $1998 \pm 5$           | 26                             |
| 4-5            | $438.7 \pm 13.6$                 | $1984 \pm 8$           | 6                              |
| 5-6            | $266.9 \pm 9.5$                  | $1977 \pm 10$          | 11                             |
| 6-7            | $375.8 \pm 12.6$                 | $1971 \pm 11$          | 10                             |
| 7-8            | $194.3 \pm 6.2$                  | $1964 \pm 13$          | 6                              |
| 8-9            | $136.7 \pm 6.3$                  | $1957 \pm 15$          | 7                              |
| 9-10           | $176.2 \pm 6.5$                  | $1950 \pm 17$          | 6                              |
| 10-11          | $113.1 \pm 5.0$                  | $1944 \pm 18$          | 3                              |
| 12-13          | $247.7 \pm 9.7$                  | $1930 \pm 20$          | 3                              |
| 13-14          | $9.4 \pm 2.4$                    | $1923 \pm 21$          | 3                              |
| 14-15          | $192.2 \pm 6.7$                  | $1917 \pm 22$          | 3                              |
| 15-16          | $3.6 \pm 1.7$                    | $1910 \pm 23$          | 9                              |
| 16-17          | $54.0 \pm 3.2$                   | $1903 \pm 24$          | 1                              |
| 18-19          | $27.0 \pm 2.7$                   | $1890 \pm 25$          | 2                              |

**Table S2.** Benthic foraminiferal taxa with relative abundance <5% on the total benthic assemblage divided on the base of the test composition

**Taxa with calcareous perforate test (29 taxa):**

*Astrononion gallowayi* Loeblich & Tappan, 1953  
*Bolivinelina pseudopunctata* (Höglund, 1947)  
*Buccella* spp. Andersen, 1952  
*Cibicides refulgens* Montfort, 1808  
*Cibicoides lobatulus* (Walker & Jacob, 1798)  
*Dentalina drammenensis* Feyling-Hanssen, 1964  
*Elphidium albiumbilicatum* (Weiss, 1954)  
*Elphidium clavatum* Cushman, 1930  
*Elphidium hallandense* Brotzen, 1943  
*Elphidium macellum* (Fichtel & Moll, 1798)  
*Fissurina* spp. Reuss, 1850  
*Globulina landesi* (Hanna & Hanna, 1924)  
*Haynesina orbiculare* (Brady, 1881)  
*Ioanella tumidula* (Brady, 1884)  
*Islandiella norcrossi* (Cushman, 1933)  
*Lagena* spp. Walker & Jacob, 1798

**Taxa with calcareous imperforate test (11 taxa)**

*Cornuspira* spp. Schultze, 1854  
*Miliolinella* cf. *enoplostoma* (Reuss, 1851)  
*Miliolinella subrotunda* (Montagu, 1803)  
*Pyrgo lucernula* (Schwager, 1866)  
*Pyrgo subglobulus* Parr, 1950  
*Pyrgo williamsoni* (Silvestri, 1923)

**Taxa with agglutinated test (19 taxa)**

*Adercotryma glomeratum* (Brady, 1878)  
*Ammobaculites agglutinans* (d'Orbigny, 1846)  
*Ammodiscus minimus* Höglund, 1947  
*Armorella sphaerica* Heron-Allen & Earland, 1932  
*Bathysiphon* spp. Sars, 1872  
*Eggerella arctica* Höglund, 1947  
*Hyperammina subnodosa* Brady, 1884  
*Lagenammina difflugiformis* (Brady, 1879)  
*Psammosphaera fusca* Schulze, 1875  
*Recurvoides contorta* Earland, 1934  
*Reophax difflugiformis* Brady Em. Skinner, 1961  
*Reophax guttifer* (Brady, 1881)  
*Reophax micaceus* (Cushman, 1918)  
*Rhabdammina discreta* Brady, 1881  
*Rhabdammina scabra* Höglund, 1947  
*Rhizammina* spp. Brady, 1879  
*Spiroplectammina biformis* (Parker & Jones, 1865)

*Lenticulina gibba* (d'Orbigny, 1839)  
*Marginulina obesa* Cushman, 1923  
*Melonis barleeanus* (Williamson, 1858)  
*Nonionella auricula* Heron-Allen & Earland, 1930  
*Oolina* spp. d'Orbigny, 1839  
*Pullenia bulloides* (d'Orbigny, 1846)  
*Pullenia* cf. *catalinaensis* McCulloch, 1977  
*Pullenia elegans* Cushman & Todd, 1943  
*Pullenia osloensis* Feyling-Hanssen, 1954  
*Robertinoides pumilum* Höglund, 1947  
*Stainforthia feylingi* Knudsen & Seidenkrantz, 1994  
*Stainforthia fusiformis* (Williamson, 1858)  
*Trifarina fluens* (Todd in Cushman & McCulloch, 1948)  
Indetermined taxa.

*Pyrgoella globula* Zheng, 1979  
*Quinqueloculina arctica* Cushman, 1933  
*Triloculina oblonga* (Montagu, 1803)  
*Triloculina rotunda* d'Orbigny in Schlumberger, 1893  
*Triloculina tricarinata* d'Orbigny in Deshayes, 1832

*Trochammina globigeriniformis* (Parker & Jones, 1865)  
*Trochammina rotaliformis* Heron-Allen & Earland, 1911

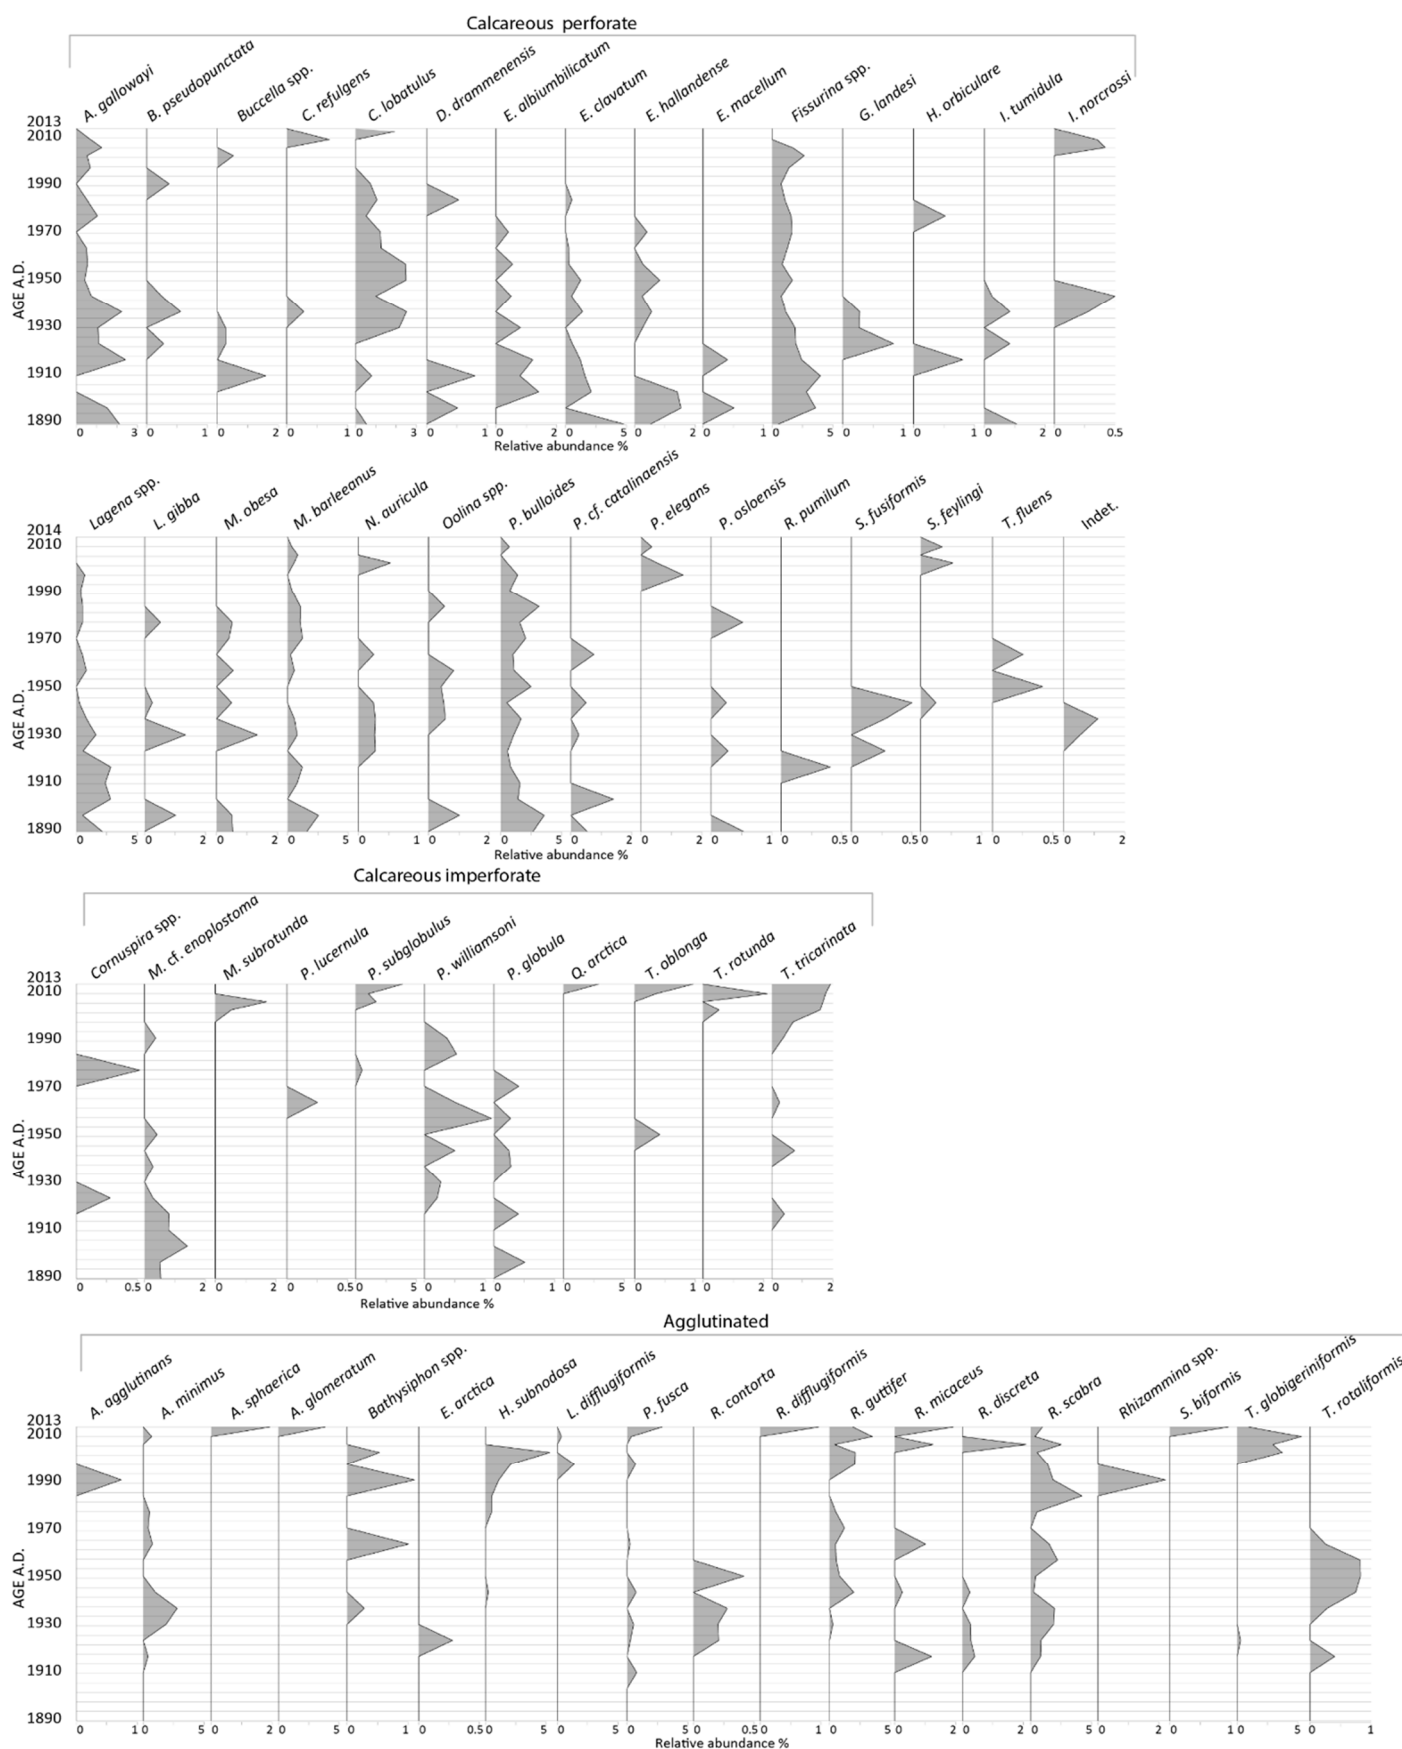

Fig.15. Benthic foraminiferal taxa with relative abundance <5% on the total benthic assemblage.
